# Supplementary material for: Establishing a multi-dimensional methodology to analyse pigments on sandstone sculptures: Exploratory investigations of an Antonine Wall Distance Sculpture
Source: Research Square preprint supplement (doi:10.21203/rs.3.rs-1662320/v1), 2022-06-08
Supplement: Supplementary file 1 [file dc451a2a10bd4c16d8485fdb.docx]

# Appendix III – FTIR-ATR Results

| FTIR sample No. | Note |
| --- | --- |
| F1.P1a | Light side down & dark brown side up |
| F1.P2a | Pink layer down and mid brown side up |
| F1.P3a | Dark side down and light down (very noisy) |
| F1.P4a | Light side down and dark side up |
| F1.P5a | Black pitch-like substance |
| F1.P6a | External layer down |
| F1.P7a | External layer up - Greyish silver |
| F1.P7b | Same as F1.P7a but with more force on sample |
| F1.P8a | Blue splash from inscription background |
| F1.P8b | Blue splash – second reading |
| F1.P9a | Cross section dark brown/black with white |
